# Supplementary material for: Retracted Article: ASIC1a involves acidic microenvironment-induced activation and autophagy of pancreatic stellate cells
Source: Royal Society of Chemistry journal article supplement (doi:10.1039/c8ra03679a), 2018-01-01
Supplement: c8ra03679a1.pdf [file c8ra03679a1.pdf]

## Supplementary Materials

### ASIC1a involves acidic microenvironment-induced activation and autophagy of pancreatic stellate cells

Tao Wang,<sup>a†</sup> Qian-qian Wang,<sup>b†</sup> Gui-xia Pan,<sup>a†</sup> Guo-rong Jia,<sup>a</sup> Xiao Li,<sup>a</sup> Chao Wang,<sup>b</sup> Li-ming Zhang<sup>b\*</sup> and Chang-jing Zuo<sup>a\*</sup>

<sup>a</sup>Department of Nuclear Medicine, Changhai Hospital, Second Military Medical University, Shanghai, 200433, China. E-mail: changjing.zuo@qq.com.

<sup>b</sup>Department of Marine Biotechnology, Faculty of Naval Medicine, Second Military Medical University, Shanghai 200433, China. E-mail: lmzhang1969@aliyun.com.

<sup>†</sup>These authors contributed equally to this work.

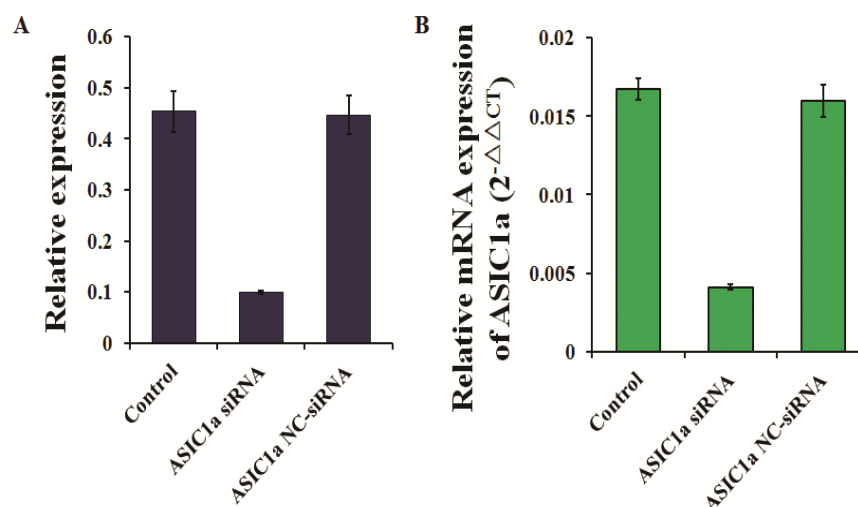

Figure S1. The efficiency of ASIC1a knockdown by siRNA was confirmed by western blotting and qRT-PCR.
